# Supplementary material
Source: Springer Nature journal article supplement (https://www.springermedizin.de/resource/supplementary/13023_2014_763_MOESM6_ESM.pdf/9643020)

**A**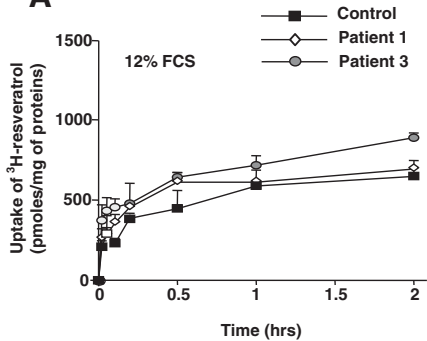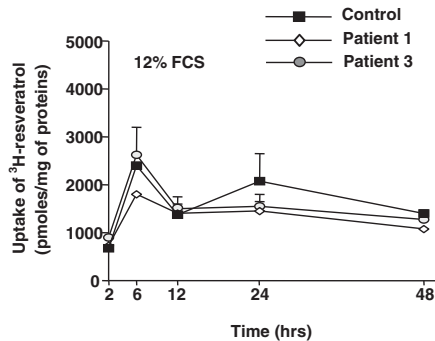**B**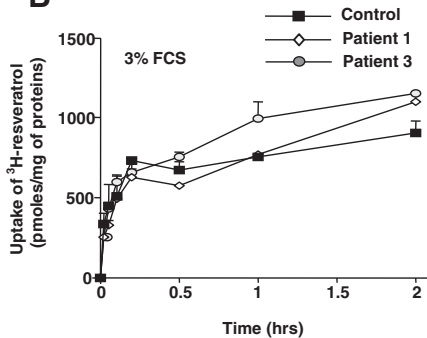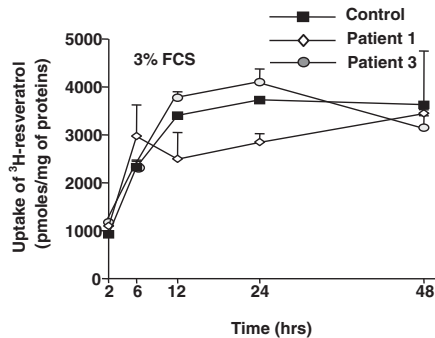

Supplement: MOESM6 [file 9643020]
